# Supplementary material
Source: PubMed Central journal article supplement (PMC3029693)
Supplement: 1016793108_pnas.1016793108_SI.pdf [file 1016793108_pnas.1016793108_SI.pdf]

# Supporting Information

Wang et al. 10.1073/pnas.1016793108

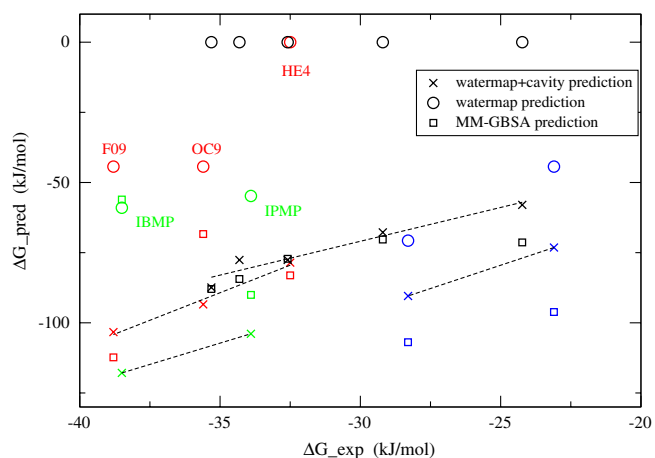

**Fig. S1.** The Watermap, Watermap+cavity, and MM-GBSA predictions for the binding affinities of different ligands to the MUP receptor versus the experimental data. The Watermap predictions are displayed as circles, Watermap+cavity predictions are displayed as crosses, and MM-GBSA predictions are displayed as rectangles. The ligands belonging to different groups are indicated by different colors. Whereas the Watermap and MM-GBSA predictions fail to rank-order most of the congeneric ligands, Watermap+cavity predictions correctly rank-order all the congeneric ligands in each group.

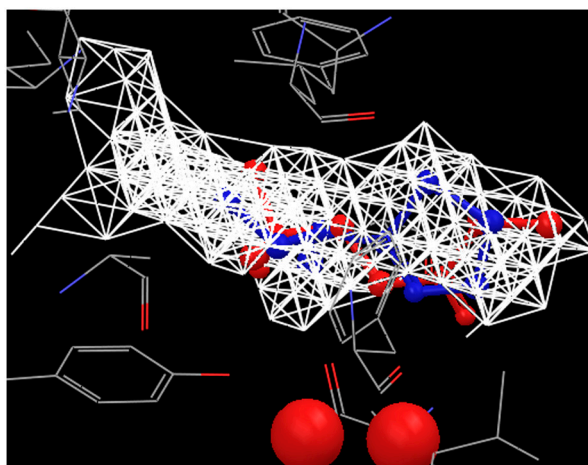

**Fig. S2.** Ligands LTL (red) and TZL (blue) binding to the MUP receptor. Large portions of the ligand atoms are located in the dry cavity region.

**Table S1. Data for the Watermap and cavity contributions to the binding affinities for different ligands binding to MUP receptor**

| Binding affinities | PE9   | HE2    | HE4   | OC9   | F09    | IBMP   | IPMP   | SBT   | PT    | IPT   | ET    | MT    |
|--------------------|-------|--------|-------|-------|--------|--------|--------|-------|-------|-------|-------|-------|
| Exp                | -23.1 | -28.3  | -32.5 | -35.6 | -38.8  | -38.5  | -33.9  | -35.3 | -34.3 | -32.6 | -29.2 | -24.2 |
| WaterMap           | -44.4 | -70.7  | 0.0   | -44.4 | -44.4  | -59.0  | 54.8   | 0.0   | 0.0   | 0.0   | 0.0   | 0.0   |
| Cavity             | -28.8 | -19.7  | -78.6 | -49.1 | -59.0  | -58.9  | -49.1  | -87.4 | -77.6 | -77.6 | -67.8 | -58.8 |
| Total              | -73.2 | -90.4  | -78.6 | -93.5 | -103.4 | -117.9 | -103.9 | -87.4 | -77.6 | -77.6 | -67.8 | -58.8 |
| MM-GBSA            | -96.2 | -106.9 | -83.1 | -68.4 | -112.3 | -56.1  | -90.0  | -88.0 | -84.4 | -77.2 | -70.3 | -71.3 |

Note1: Free energies in kJ/mol. For ligand PE9, the PDB structure (PDB ID 1ZND) contains two ligands (with two binding modes). However, experimental ITC data indicate a binding stoichiometry of approximately 1 for PE9 (1), so only the binding mode with stronger binding affinity was analyzed. The predicted binding affinities for the two binding modes agree with experimental data.

Note 2: Ligands PE9 and HE2 bind in a similar orientation whereas ligands HE4, OC9, and F09 bind in an alternate orientation. So they are considered as two groups (1).

Note 3: For SBT series of ligands, PDB structures are only available for SBT/MUP complex, and structures of other ligands were obtained by removing the appropriate carbon atoms from SBT.

1 Malham R, et al. (2005) Strong solute-solute dispersive interactions in a protein-ligand complex. *J Am Chem Soc* 127:17061-17067.

**Table S2. The structure of the ligands and their associated PDB ID**

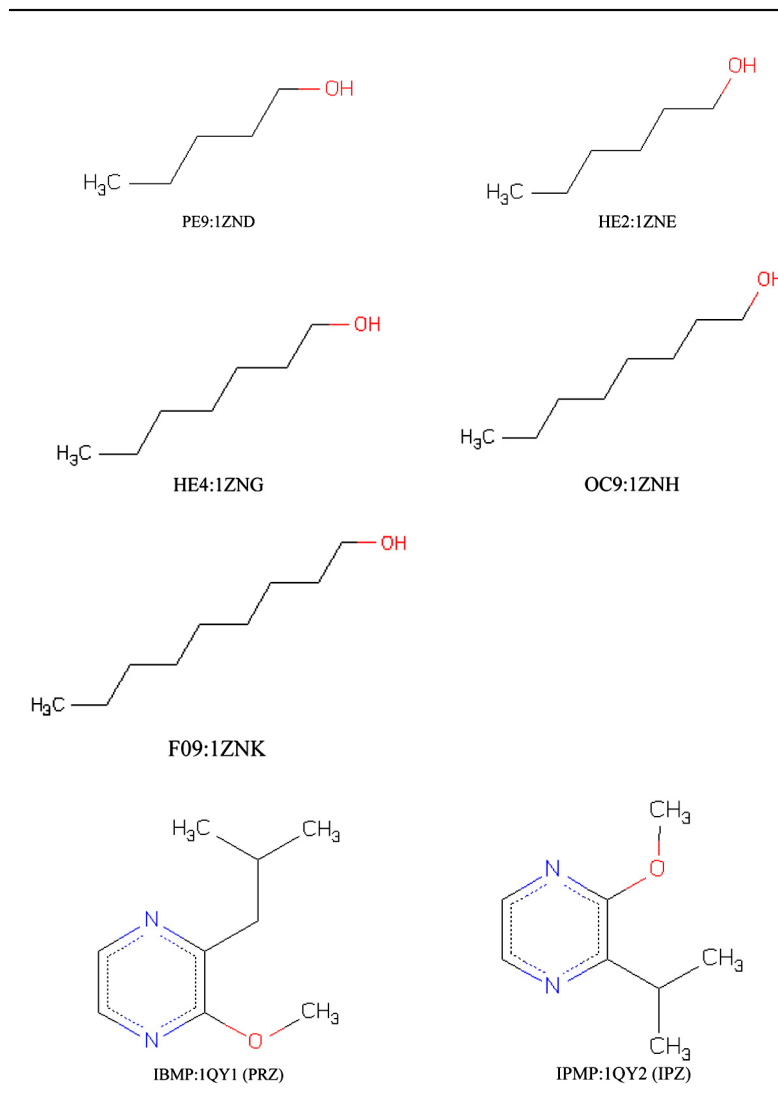

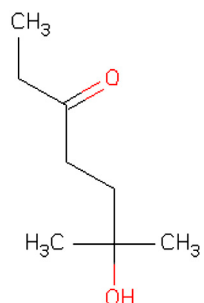

LTL:1105 (HMH)

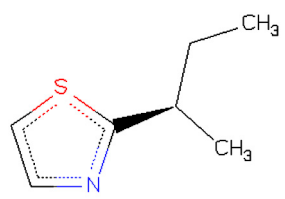

TZL:1106 (SBT)

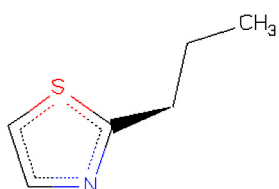

PT

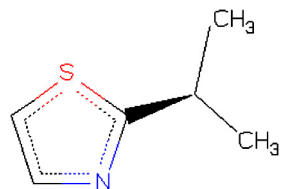

IPT

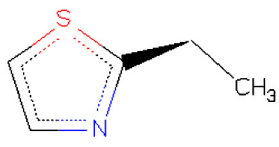

ET

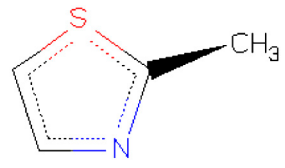

MT

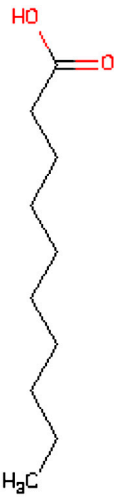

DKA:1WBE

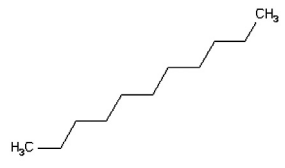

UND:1Y9L
